# Supplementary material
Source: Frontiers journal article supplement (https://www.frontiersin.org/articles/185005)
Supplement: Data_Sheet_1.pdf [file Data_Sheet_1.pdf]

**Appendix 1: Unadjusted and adjusted multilevel regression analysis of health centre and patient level characteristics on recording of absolute CVRA for patients with diabetes in participating health centres between 1 January 2012 and 31 December 2014 (n=121 health centres; 1,728 patient records)**

| Predictors                      |                           | Unadjusted odds ratio |                      |                    | Empty Model  | Model A – Health centre characteristics only |              |                    | Model B – Health centre and patient characteristics |                      |                    |
|---------------------------------|---------------------------|-----------------------|----------------------|--------------------|--------------|----------------------------------------------|--------------|--------------------|-----------------------------------------------------|----------------------|--------------------|
|                                 |                           | UOR                   | 95%CI                | p value            |              | OR                                           | 95%CI        | p value            | OR                                                  | 95%CI                | p value            |
| Health Centre Characteristics   |                           |                       |                      |                    |              |                                              |              |                    |                                                     |                      |                    |
| State                           | Northern Territory        | 127.42                | 48.30–336.17         | 0.000 <sup>b</sup> |              | 133.00                                       | 57.77–306.19 | 0.000 <sup>b</sup> | 130.33                                              | 55.45–306.35         | 0.000 <sup>b</sup> |
|                                 | Other states <sup>a</sup> | 1                     | (base)               |                    |              | 1                                            | (base)       |                    | 1                                                   | (base)               |                    |
| Location                        | Non-remote                | 1                     | (base)               |                    |              | 1                                            | (base)       |                    | 1                                                   | (base)               |                    |
|                                 | Remote                    | 13.79                 | 1.12–169.73          | 0.040 <sup>b</sup> |              | 1.32                                         | 9.31–5.66    | 0.705              | 1.46                                                | 0.33–6.50            | 0.623              |
|                                 | Very remote               | 6.83                  | 1.17–39.93           | 0.033 <sup>b</sup> |              | 0.33                                         | 0.10–1.07    | 0.066              | 0.29                                                | 0.09–0.97            | 0.045 <sup>b</sup> |
| Type of health centre:          | Community–controlled      | 1                     | (base)               |                    |              | 1                                            | (base)       |                    | 1                                                   | (base)               |                    |
|                                 | Government                | 3.02                  | 0.72–12.55           | 0.129              |              | 14.61                                        | 5.62–37.95   | 0.000 <sup>b</sup> | 14.19                                               | 5.33–37.80           | 0.000 <sup>b</sup> |
| Service population              |                           |                       |                      |                    |              |                                              |              |                    |                                                     |                      |                    |
|                                 | ≤500                      | 1                     | (base)               |                    |              | 1                                            | (base)       |                    | 1                                                   | (base)               |                    |
|                                 | 501 – 999                 | 0.32                  | 0.08–1.31            | 0.115              |              | 0.91                                         | 0.38–2.14    | 0.823              | 0.97                                                | 0.40–2.33            | 0.944              |
|                                 | ≥1000                     | 0.27                  | 0.08–0.89            | 0.032 <sup>b</sup> |              | 0.64                                         | 0.30–1.38    | 0.256              | 0.64                                                | 0.29–1.37            | 0.248              |
| CQI experience                  | Nil previous cycles       | 1                     | (base)               |                    |              | 1                                            | (base)       |                    | 1                                                   | (base)               |                    |
|                                 | 1–2 previous cycles       | 2.19                  | 0.33–14.42           | 0.416              |              | 0.66                                         | 0.21–2.09    | 0.479              | 0.58                                                | 0.18–1.89            | 0.368              |
|                                 | ≥3 previous cycles        | 2.01                  | 0.30–13.37           | 0.469              |              | 0.78                                         | 0.25–2.42    | 0.668              | 0.69                                                | 0.22–2.19            | 0.532              |
| Patient Characteristics         |                           |                       |                      |                    |              |                                              |              |                    |                                                     |                      |                    |
| Sex                             | Male                      | 1                     | (base)               |                    |              |                                              |              |                    | 1                                                   | (base)               |                    |
|                                 | Female                    | 1.48                  | 1.09–2.00            | 0.012 <sup>b</sup> |              |                                              |              |                    | 1.52                                                | 1.11–2.08            | 0.009 <sup>b</sup> |
| Age Group                       | 15 – <30                  | 1                     | (base)               |                    |              |                                              |              |                    | 1                                                   | (base)               |                    |
|                                 | 30 – <45                  | 1.07                  | 0.64–1.80            | 0.791              |              |                                              |              |                    | 1.07                                                | 0.64–1.80            | 0.797              |
|                                 | 45 – 60                   | 1.20                  | 0.72–2.02            | 0.483              |              |                                              |              |                    | 1.27                                                | 0.74–2.17            | 0.386              |
| Comorbidities <sup>c</sup>      | Hypertension              | 1.03                  | 0.75–1.42            | 0.835              |              |                                              |              |                    | 0.97                                                | 0.69–1.37            | 0.866              |
|                                 | COPD                      | 0.94                  | 0.60–1.47            | 0.793              |              |                                              |              |                    | 0.88                                                | 0.56–1.39            | 0.592              |
|                                 | Dyslipidaemia             | 1.23                  | 0.91–1.67            | 0.183              |              |                                              |              |                    | 1.21                                                | 0.88–1.67            | 0.246              |
|                                 | CKD                       | 1.55                  | 1.08–2.22            | 0.017 <sup>b</sup> |              |                                              |              |                    | 1.32                                                | 0.92–1.90            | 0.136              |
|                                 | Depression                | 0.81                  | 0.42–1.55            | 0.527              |              |                                              |              |                    | 0.89                                                | 0.45–1.76            | 0.737              |
|                                 | Other mental illness      | 0.70                  | 0.34–1.45            | 0.337              |              |                                              |              |                    | 0.74                                                | 0.35–1.55            | 0.420              |
| Complications <sup>c</sup>      | Retinopathy               | 0.90                  | 0.44–1.83            | 0.764              |              |                                              |              |                    | 0.89                                                | 0.43–1.86            | 0.764              |
|                                 | Neuropathy                | 0.74                  | 0.35–1.56            | 0.429              |              |                                              |              |                    | 0.73                                                | 0.34–1.56            | 0.410              |
|                                 | Foot ulcer                | 2.14                  | 0.65–6.99            | 0.210              |              |                                              |              |                    | 2.41                                                | 0.71–8.18            | 0.158              |
|                                 | Amputation                | 1.45                  | 0.27–7.79            | 0.667              |              |                                              |              |                    | 1.31                                                | 0.26–6.67            | 0.748              |
|                                 | Gastroparesis             | 1                     | (empty) <sup>d</sup> |                    |              |                                              |              |                    | 1                                                   | (empty) <sup>d</sup> |                    |
| Random effects (intercepts)     |                           |                       |                      |                    | 10.04 (2.46) | 1.22 (0.35)                                  |              | 1.26 (0.36)        |                                                     |                      |                    |
| Variance (SE)                   |                           |                       |                      |                    |              | 87.82%                                       |              | 87.40%             |                                                     |                      |                    |
| Proportional change in variance |                           |                       |                      |                    |              |                                              |              |                    |                                                     |                      |                    |

<sup>a</sup>Other states include Queensland, South Australia and Western Australia

<sup>b</sup> Statistically significant

<sup>c</sup>Comorbidities and complications were compared with patients without the specific comorbidity or complication, such that an odds ratio of 1 relates to not having the specific comorbidity or complication.

<sup>cd</sup>The 19 patients with gastroparesis did not have any recorded CVRA.
