# Supplementary material
Source: Frontiers journal article supplement (https://www.frontiersin.org/articles/185005)
Supplement: Data_Sheet_2.pdf [file Data_Sheet_2.pdf]

**Appendix 2: Unadjusted and adjusted multilevel regression analysis of health centre and patient level characteristics on recording of absolute CVRA for patients with diabetes and no documented chronic kidney disease in participating health centres in the Northern Territory between 1 January 2012 and 31 December 2014 (n= 52 health centres; 677 patient records)**

| Predictors                                  |                      | Unadjusted odds ratio |            |                    | Empty Model | Model A – Health centre characteristics only |            |                    | Model B – Health centre and patient characteristics |            |                    |
|---------------------------------------------|----------------------|-----------------------|------------|--------------------|-------------|----------------------------------------------|------------|--------------------|-----------------------------------------------------|------------|--------------------|
|                                             |                      | UOR                   | 95%CI      | p value            |             | OR                                           | 95%CI      | p value            | OR                                                  | 95%CI      | p value            |
| Health Centre Characteristics               |                      |                       |            |                    |             |                                              |            |                    |                                                     |            |                    |
| Location                                    | Non-remote           | 1                     | (base)     |                    |             | 1                                            | (base)     |                    | 1                                                   | (base)     |                    |
|                                             | Remote               | 2.69                  | 0.17–41.48 | 0.478              |             | 8.18                                         | 0.92–72.79 | 0.060              | 8.51                                                | 0.86–84.67 | 0.068              |
|                                             | Very remote          | 2.11                  | 0.19–22.92 | 0.540              |             | 1.33                                         | 0.21–8.57  | 0.763              | 1.17                                                | 0.17–8.25  | 0.876              |
| Type of health centre: Community–controlled |                      | 1                     | (base)     |                    |             | 1                                            | (base)     |                    |                                                     |            |                    |
|                                             | Government           | 11.41                 | 4.83–26.91 | 0.000 <sup>a</sup> |             | 14.39                                        | 5.41–38.26 | 0.000 <sup>a</sup> | 16.05                                               | 5.72–45.01 | 0.000 <sup>a</sup> |
| Service population                          |                      |                       |            |                    |             |                                              |            |                    |                                                     |            |                    |
|                                             | ≤500                 | 1                     | (base)     |                    |             | 1                                            | (base)     |                    | 1                                                   | (base)     |                    |
|                                             | 501 – 999            | 0.45                  | 0.14–1.44  | 0.177              |             | 1.44                                         | 0.54–3.88  | 0.470              | 1.47                                                | 0.52–4.11  | 0.464              |
|                                             | ≥1000                | 0.36                  | 0.13–1.00  | 0.049 <sup>a</sup> |             | 0.60                                         | 0.26–1.41  | 0.243              | 0.64                                                | 0.26–1.55  | 0.321              |
| CQI experience                              | Nil previous cycles  | 1                     | (base)     |                    |             | 1                                            | (base)     |                    | 1                                                   | (base)     |                    |
|                                             | 1–2 previous cycles  | 3.07                  | 0.46–20.53 | 0.246              |             | 1.17                                         | 0.28–4.91  | 0.827              | 1.13                                                | 0.26–5.01  | 0.871              |
|                                             | ≥3 previous cycles   | 1.06                  | 0.16–6.91  | 0.953              |             | 0.99                                         | 0.25–3.95  | 0.988              | 0.98                                                | 0.23–4.15  | 0.980              |
| Patient Characteristics                     |                      |                       |            |                    |             |                                              |            |                    |                                                     |            |                    |
| Sex                                         | Male                 | 1                     | (base)     |                    |             |                                              |            |                    | 1                                                   | (base)     |                    |
|                                             | Female               | 1.50                  | 1.01–2.24  | 0.047 <sup>a</sup> |             |                                              |            |                    | 1.48                                                | 0.97–2.25  | 0.068              |
| Age Group                                   | 15 – <30             | 1                     | (base)     |                    |             |                                              |            |                    | 1                                                   | (base)     |                    |
|                                             | 30 – <45             | 1.04                  | 0.58–1.87  | 0.901              |             |                                              |            |                    | 1.02                                                | 0.56–1.88  | 0.939              |
|                                             | 45 – 60              | 1.16                  | 0.64–2.09  | 0.634              |             |                                              |            |                    | 1.19                                                | 0.63–2.25  | 0.602              |
| Comorbidities <sup>b</sup>                  | Hypertension         | 1.00                  | 0.63–1.58  | 0.998              |             |                                              |            |                    | 0.92                                                | 0.56–1.49  | 0.725              |
|                                             | COPD                 | 0.70                  | 0.40–1.25  | 0.231              |             |                                              |            |                    | 0.71                                                | 0.39–1.28  | 0.249              |
|                                             | Dyslipidaemia        | 1.08                  | 0.73–1.60  | 0.700              |             |                                              |            |                    | 1.20                                                | 0.78–1.83  | 0.403              |
|                                             | Depression           | 1.08                  | 0.47–2.49  | 0.861              |             |                                              |            |                    | 1.43                                                | 0.57–3.61  | 0.446              |
|                                             | Other mental illness | 0.47                  | 0.18–1.22  | 0.121              |             |                                              |            |                    | 0.41                                                | 0.15–1.13  | 0.084              |
| Complications <sup>b</sup>                  | Retinopathy          | 1.23                  | 0.45–3.38  | 0.683              |             |                                              |            |                    | 1.36                                                | 0.47–3.97  | 0.575              |
|                                             | Neuropathy           | 0.41                  | 0.14–1.17  | 0.095              |             |                                              |            |                    | 0.41                                                | 0.14–1.20  | 0.103              |
|                                             | Foot ulcer           | 2.25                  | 0.51–10.03 | 0.286              |             |                                              |            |                    | 2.83                                                | 0.59–13.61 | 0.193              |
|                                             | Amputation           | 1.31                  | 0.18–9.43  | 0.789              |             |                                              |            |                    | 1.07                                                | 0.14–8.40  | 0.947              |
|                                             | Gastroparesis        | 1                     | (empty)    |                    |             |                                              |            |                    | 1                                                   | (empty)    |                    |
| Random effects (intercepts)                 |                      |                       |            |                    | 2.27 (0.65) |                                              |            |                    |                                                     |            |                    |
| Variance (SE)                               |                      |                       |            |                    |             | 0.81 (0.30)                                  |            |                    |                                                     |            |                    |
| Proportional change in variance             |                      |                       |            |                    |             | 64.27%                                       |            |                    |                                                     |            |                    |

<sup>a</sup> Statistically significant

<sup>b</sup> Comorbidities and complications were compared with patients without the specific comorbidity or complication, such that an odds ratio of 1 relates to not having the specific comorbidity or complication.

<sup>c</sup> The 5 patients with gastroparesis did not have any recorded CVRA.
